# Supplementary material for: A Portrait of SARS-CoV-2 Infection in Patients Undergoing Hematopoietic Cell Transplantation: A Systematic Review of the Literature
Source: MDPI journal article supplement (doi:10.3390/curroncol29010030), 2022-01-13

*Systematic Review*

# A Portrait of Sars-CoV-2 Infection in Patients Undergoing Hematopoietic Cell Transplantation: A Systematic Review of the Literature

Adrian J.M. Bailey, Aidan M. Kirkham, Madeline Monaghan <sup>2</sup>, Risa Shorr, C. Arianne Buchan, Christopher Bredeson and David S. Allan

**Table S1.** Search strategy for Medline and Embase, updated to June 1<sup>st</sup> 2021. (Performed by Risa Shorr, Librarian Specialising in Systematic Searches, The Ottawa Hospital).

Ovid MEDLINE(R) ALL <1946 to June 04, 2021>

- 1 COVID-19/ 82696
- 2 (exp coronavirus/ or coronavirus\*.mp. or corona virus\*.mp.) and (wuhan or beijing or shanghai or hubei).mp. 5523
- 3 ((coronavirus\* or corona virus\* or coronavirus\* or coronaviridae or coronaviridae or betacoronavirus\*) adj3 ("19" or "2019")).tw. 36191
- 4 covid.tw,kw. 121646
- 5 covid19.tw,kw. or covid 19.kw.55184
- 6 sars cov 2.tw,kw. 45292
- 7 (ncov or n cov).tw,kw. 1479
- 8 (novel coronavirus\* or novel corona virus\*).tw,kw. 8937
- 9 (CoV 2 or CoV2 or sarscov2 or 2019nCoV or novel CoV or wuhan virus\*).tw,kw. 40460
- 10 (Coronavirus Infections/ or Severe Acute Respiratory Syndrome/) and (Pandemics/ or pandemic\*.tw,kf.) 39658
- 11 or/1-10 142789
- 12 Bone Marrow Transplantation/ 44968
- 13 exp Hematopoietic Stem Cell Transplantation/ 48057
- 14 bmt.tw,kw. 10737
- 15 bone marrow transplant\*.tw,kw. 33565
- 16 stem cell transplant\*.tw,kw. 51378
- 17 ((h?ematopoietic adj3 transplant\*) or hsct\*).tw. 35511
- 18 (peripheral blood cell transplant\* or pbsct).tw,kw. 1446
- 19 STEM CELL TRANSPLANTATION/ 24666
- 20 (hsct or H?ematopoietic Stem Cell Transplant\*).kw. 3369
- 21 stem cell therap\*.tw,kw. 7878
- 22 Cord Blood Stem Cell Transplantation/ 3379
- 23 ((cord blood or placenta\* blood\*) adj5 transplant\*).tw. 4000
- 24 ((cord blood or placenta\* blood\*) and transplant\*).kf. 636
- 25 or/12-24 149572

26 11 and 25 340  
 27 (2021031\* or 2021032\* or 2021033\* or 202104\* or 202105\* or 202106\*).dt. 393807  
 28 26 and 27 68

Embase Classic+Embase <1947 to 2021 June 04>

1 coronavirus disease 2019/ 117729  
 2 (Coronavirinae/ or coronavirus\*.mp. or corona virus\*.mp.) and (wuhan or beijing or shanghai or hubei).mp.  
 6164  
 3 ((coronavirus\* or corona virus\* or coronavirus\* or coronaviridae or coronaviridae or betacoronavirus\*) adj3  
 ("19" or "2019")).tw. 34145  
 4 (covid or covid19).tw. 120084  
 5 sars cov 2.tw. 37667  
 6 (ncov or n cov).tw.1524  
 7 (novel coronavirus\* or novel corona virus\*).tw. 8411  
 8 (CoV 2 or CoV2 or sarscov2 or 2019nCoV or novel CoV or wuhan virus).tw. 39128  
 9 (coronavirus infection/ or severe acute respiratory syndrome/) and (pandemic/ or pandemic\*.tw.)  
 11199  
 10 limit 9 to yr="2019 -Current" 10428  
 11 1 or 2 or 3 or 4 or 5 or 6 or 7 or 8 or 10 145891  
 12 exp hematopoietic stem cell transplantation/ 71589  
 13 allogenic bone marrow transplantation/ 10239  
 14 stem cell transplantation/ 44203  
 15 bone marrow transplantation/ 54499  
 16 allogeneic stem cell transplantation/ 16270  
 17 allogeneic peripheral blood stem cell transplantation/ 1192  
 18 peripheral blood stem cell transplantation/ 3425  
 19 allogeneic hematopoietic stem cell transplantation/ 26050  
 20 ((h?ematopoietic adj3 transplant\*) or hsct\*).tw. 68614  
 21 (peripheral blood cell transplant\* or pbsct).tw. 2296  
 22 stem cell transplant\*.tw. 97767  
 23 bone marrow transplant\*.tw. 44082  
 24 stem cell therap\$.tw. 10258  
 25 Cord Blood Stem Cell Transplantation/ 6358  
 26 ((cord blood or placenta\* blood\*) adj5 transplant\*).tw. 6819  
 27 CBSCT.tw. 45  
 28 exp autologous stem cell transplantation/ 27170  
 29 or/12-28 245191  
 30 11 and 29 595  
 31 (2021031\* or 2021032\* or 2021033\* or 202104\* or 202105\* or 202106\*).dc. 695964  
 32 30 and 31 158

**Table S2.** Scoring Distribution of Quality Assessment of Studies Using the Newcastle-Ottawa Scale.

| STUDY                       | SELECTION | COMPARABILITY | OUTCOME | TOTAL |
|-----------------------------|-----------|---------------|---------|-------|
| <b>Cohort Studies</b>       |           |               |         |       |
| Coll 2020                   | 4         | 1             | 3       | 8     |
| Piñana 2020                 | 4         | 2             | 3       | 9     |
| Camargo 2021                | 4         | 0             | 3       | 7     |
| Shah 2020                   | 4         | 1             | 3       | 8     |
| Xhaard 2021                 | 4         | 1             | 3       | 8     |
| <b>Case-Control Studies</b> |           |               |         |       |
| Sharma 2021                 | 4         | 2             | 3       | 9     |
| Ljungman 2021               | 4         | 2             | 3       | 9     |

**Figure S1.** Risk of mortality with increasing age in allogenic transplant recipients.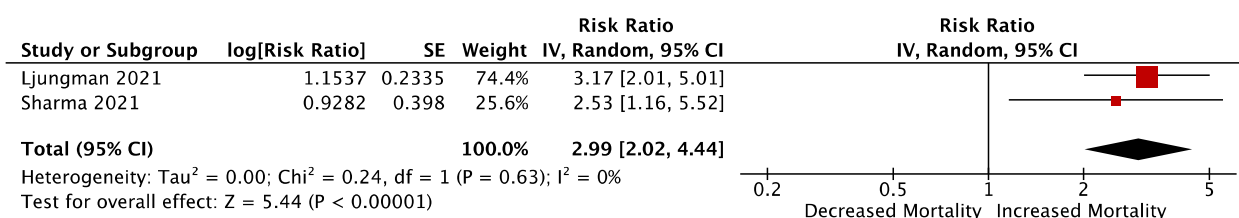**Figure S2.** Risk of mortality with increasing age in autologous transplant recipients.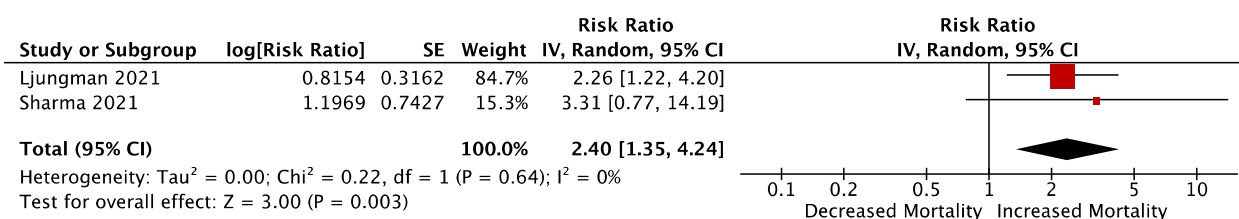

Supplement: s1 [file s1]
